# Supplementary material for: Synergistic enhancement of hydrogen interactions in palladium–silicon–gold metallic glass with multilayered graphene
Source: Royal Society of Chemistry journal article supplement (doi:10.1039/d3ta01734f), 2023-01-01
Supplement: d3ta01734f1.pdf [file d3ta01734f1.pdf]

**Electronic Supplementary Information**

**Synergistic enhancement of hydrogen interactions  
in palladium-gold-silicon metallic glass  
on multilayered graphene†**

Baran Sarac,<sup>a</sup> Yurii P. Ivanov,<sup>bc</sup> Barbara Putz,<sup>\*de</sup> Tolga Karazehir,<sup>f</sup> Christian

Mitterer,<sup>d</sup> A. Lindsay Greer,<sup>b</sup> A. Sezai Sarac<sup>g</sup> and Jürgen Eckert<sup>ad</sup>

<sup>a</sup> *Erich Schmid Institute of Materials Science, Austrian Academy of Sciences, 8700 Leoben, Austria*

<sup>b</sup> *Department of Materials Science & Metallurgy, University of Cambridge, Cambridge, CB3 0FS,*

<sup>c</sup> *Electron Spectroscopy and Nanoscopy, Istituto Italiano di Tecnologia, Via Morego 30, 16163  
Genova, Italy*

<sup>d</sup> *Department of Materials Science, Montanuniversität Leoben, 8700 Leoben, Austria*

<sup>e</sup> *Empa, Swiss Federal Laboratories for Materials Science and Technology, Laboratory for  
Mechanics of Materials and Nanostructures, 3602, Thun, Switzerland*

<sup>f</sup> *Department of Energy System Engineering, Adana Alparslan Türkeş Science and Technology  
University, 01250 Sarıcam, Adana, Turkey*

<sup>g</sup> *Polymer Science and Technology, Istanbul Technical University, 34469 Istanbul, Turkey*

\*Corresponding author: [barbara.putz@unileoben.ac.at](mailto:barbara.putz@unileoben.ac.at)

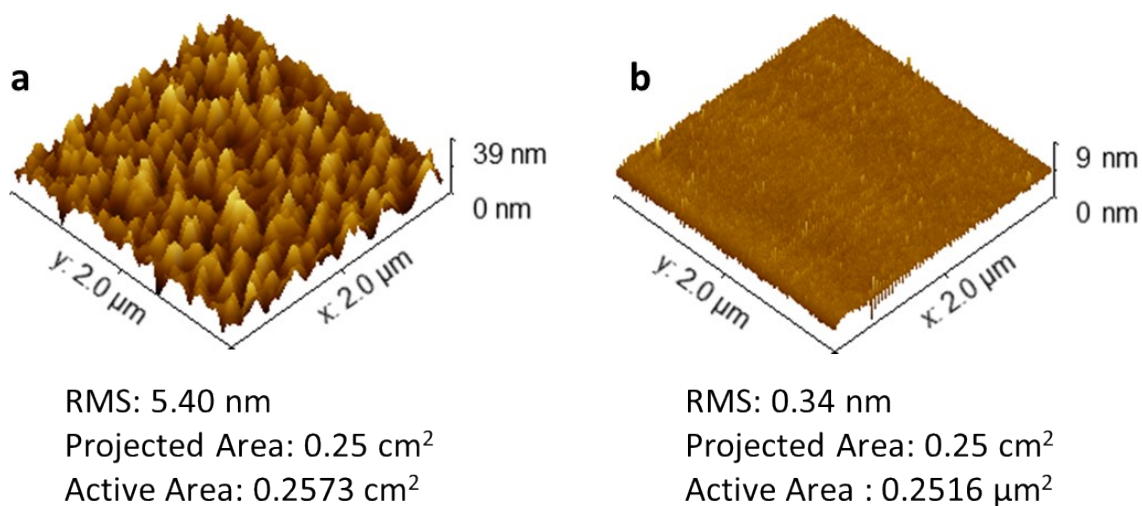

**Fig. S1.** Tribological analysis of the (a) PdSiAu+Si/SiO<sub>2</sub> and (b) MLGR+PdSiAu+Si/SiO<sub>2</sub> using atomic force microscopy. The room mean square (RMS) roughness, projected and active areas are provided below the corresponding images.

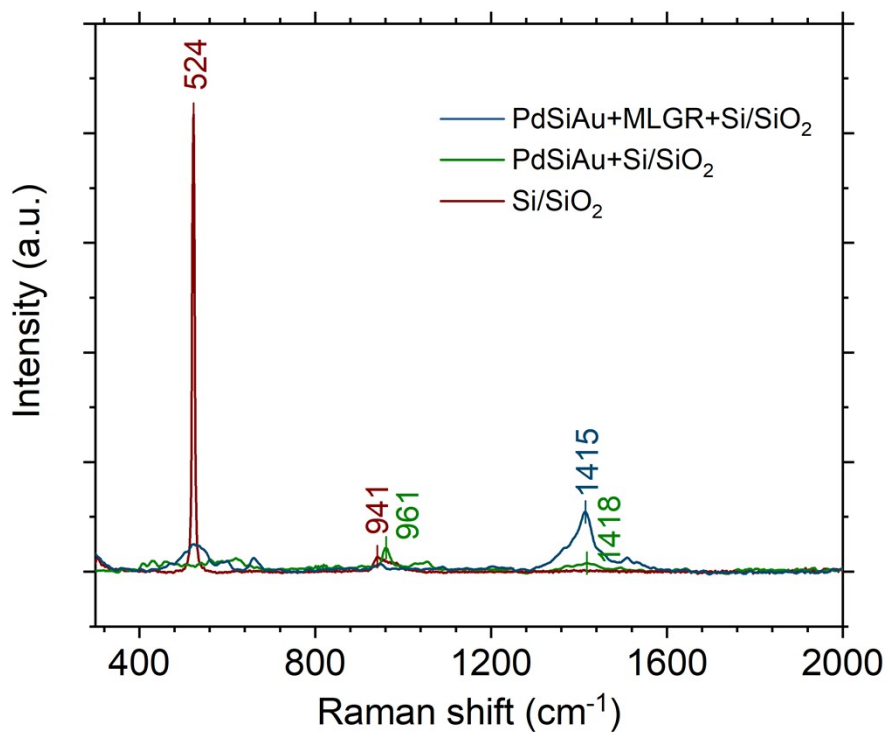

**Fig S2.** Raman spectroscopy of MLGR+PdSiAu+Si/SiO<sub>2</sub>, PdSiAu+Si/SiO<sub>2</sub> and Si/SiO<sub>2</sub> showing the full spectra.

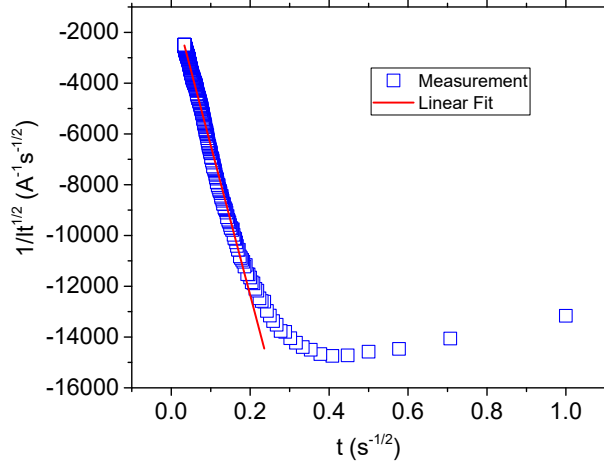

**Fig. S3.** Plot of  $1/It^{1/2}$  vs.  $t$  for MLGR+PdSiAu+Si/SiO<sub>2</sub>. The open blue squares and the red line depict measured data and the best linear fit. The slope and y-intercept of the linear fit correspond,

respectively, to  $\frac{R_{\Sigma}}{\Delta E}$  and  $\frac{l\sqrt{\pi}}{\Delta Q\sqrt{D}}$  in equation 1. Linear fitting is applied to the region where the data are linearized until the saturation point.

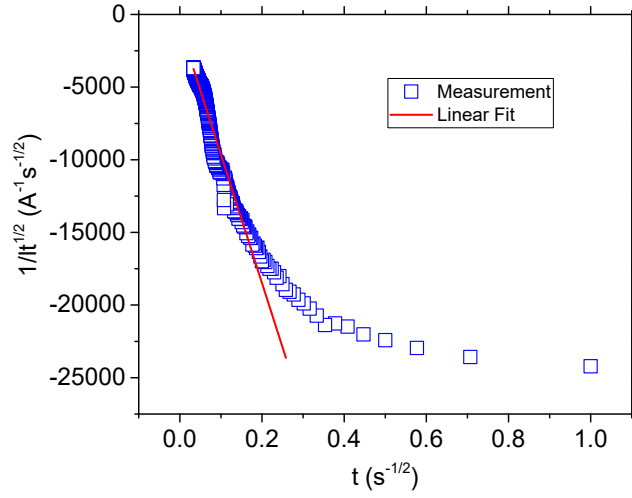

**Fig. S4.** Plot of  $1/It^{1/2}$  vs.  $t$  for PdSiAu+Si/SiO<sub>2</sub>. The open blue squares and the red line depict measured data and the best linear fit. The slope and y-intercept of the linear fit correspond,

respectively, to  $\frac{R_{\Sigma}}{\Delta E}$  and  $\frac{l\sqrt{\pi}}{\Delta Q\sqrt{D}}$  in equation 1. Linear fitting is applied to the region where the data are linearized until the saturation point.

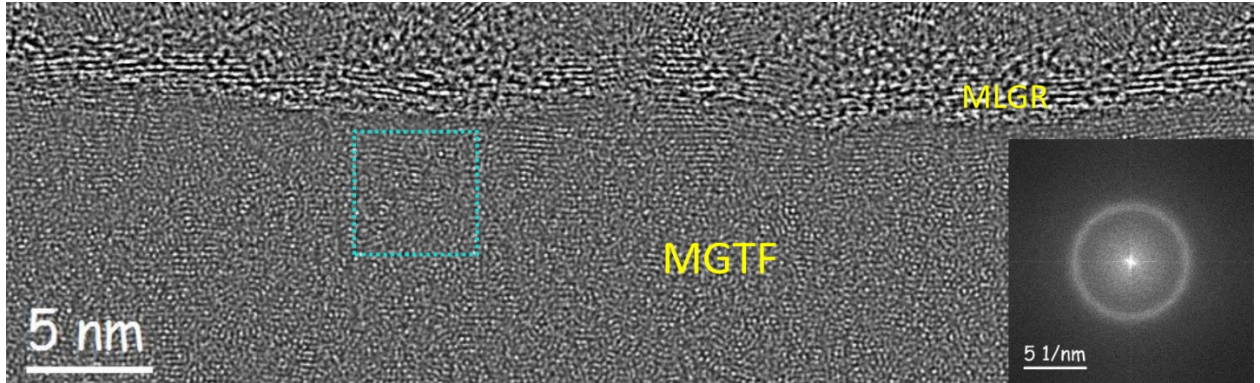

**Fig. S5.** HRTEM imaging of the as-sputter deposited MLGR+PdSiAu layers and FFT pattern of the region indicated by the cyan square.

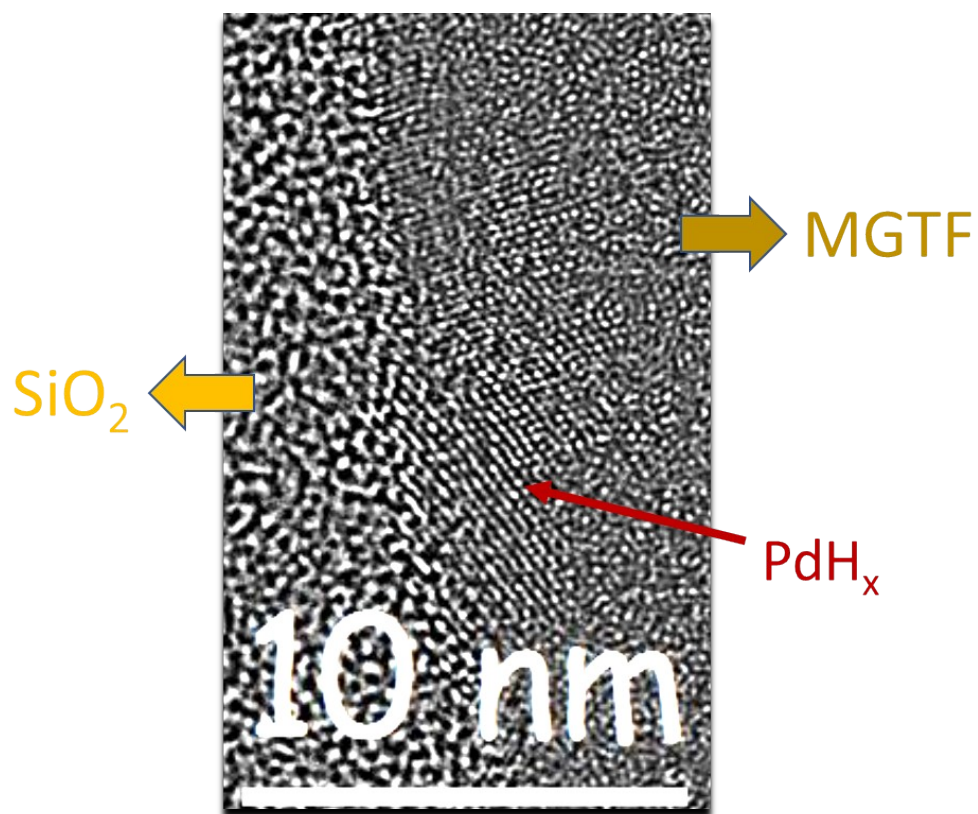

**Fig. S6.** Close-up HRTEM image of the MGTF - Si/SiO<sub>2</sub> interface showing PdH<sub>x</sub> nanocrystals.

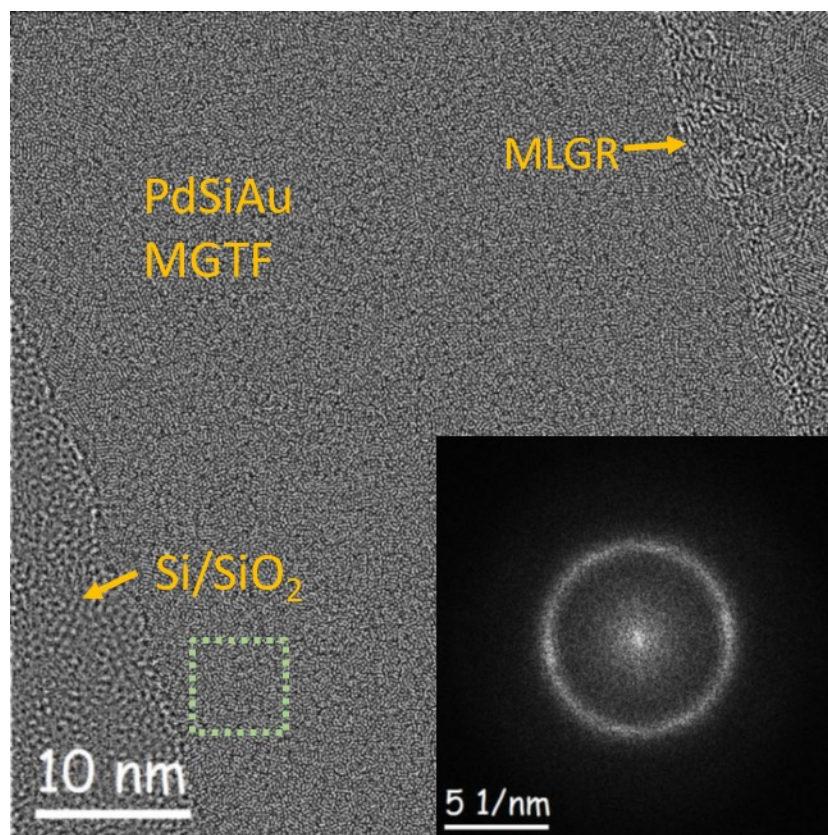

**Fig. S7.** HRTEM imaging of the entire layer of the as-sputter deposited MLGR+PdSiAu layers on Si/SiO<sub>2</sub> substrate and FFT pattern of the region indicated by the light green square.

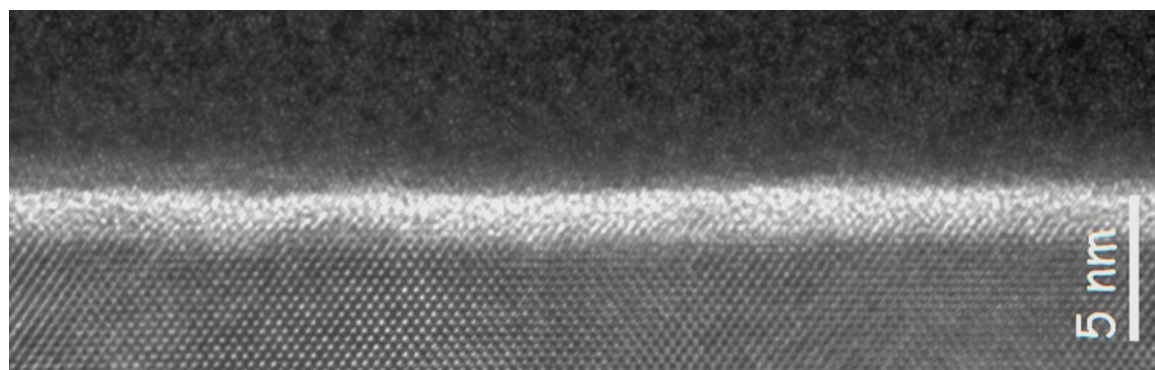

**Fig. S8.** HRTEM imaging of the PdSiAu MGTF and Si/SiO<sub>2</sub> interface

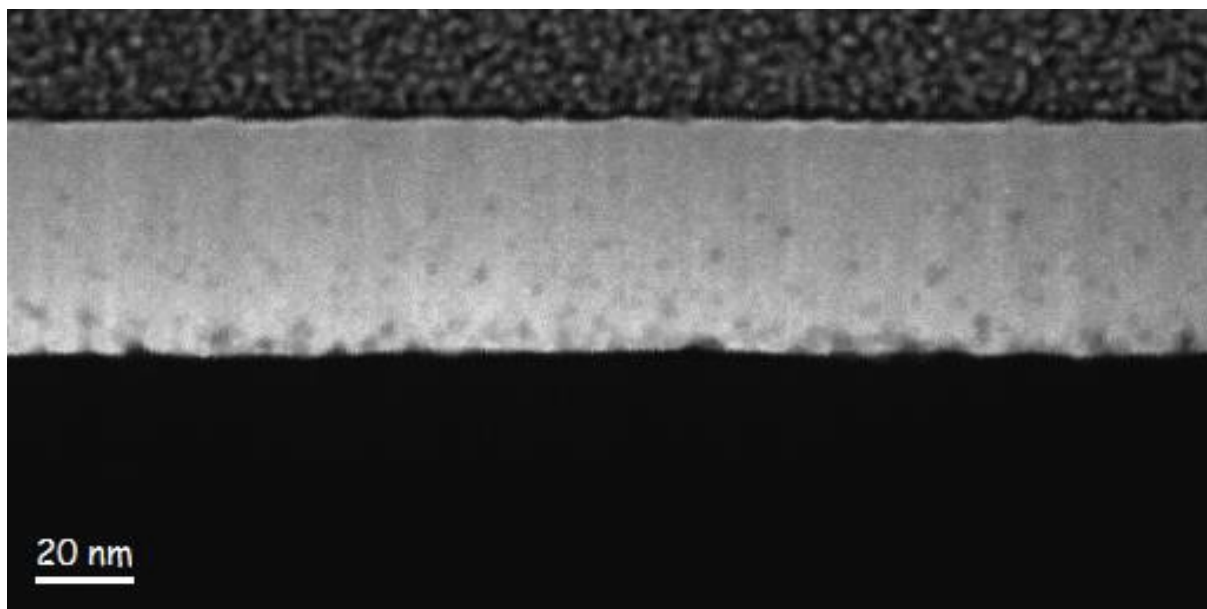

**Fig. S9.** HAADF imaging after hydrogenation of MLGR+PdSiAu+Si/SiO<sub>2</sub>; scattered black regions correspond to nanovoids formed during hydrogen-metal interactions.
